# Supplementary material for: A Phase I Study of Ribociclib Plus Everolimus in Patients with Metastatic Pancreatic Adenocarcinoma Refractory to Chemotherapy
Source: PubMed Central journal article supplement (PMC7337242; doi:10.1089/pancan.2020.0005), 2020-06-22

## Supplementary Data

**Supplementary Table S1. Defining Dose-Limiting Toxicities Related to Ribociclib or Everolimus**

| Toxicity                                   | DLT (per CTCAE v. 4.03)                                                                                                                                                                                                                                                                                                                                        |
|--------------------------------------------|----------------------------------------------------------------------------------------------------------------------------------------------------------------------------------------------------------------------------------------------------------------------------------------------------------------------------------------------------------------|
| Hematology                                 | <p>≥Grade 4 neutropenia (absolute neutrophil count &lt;500/<math>\mu</math>L) lasting ≥7 consecutive days</p> <p>≥Grade 4 thrombocytopenia</p> <p>Grade 3 thrombocytopenia with clinically significant bleeding</p> <p>Grade 3 or 4 febrile neutropenia</p>                                                                                                    |
| ECG QT interval                            | QTc interval ≥501 ms on at least two separate ECGs                                                                                                                                                                                                                                                                                                             |
| Cardiac                                    | <p>≥Grade 3 cardiac toxicity, clinical signs of cardiac disease such as unstable angina, myocardial infarction, or troponin ≥grade 3</p>                                                                                                                                                                                                                       |
| Gastrointestinal                           | <p>≥Grade 3 vomiting ≥48 h despite optimal antiemetic therapy</p> <p>≥Grade 3 diarrhea ≥48 h despite optimal antidiarrheal therapy</p> <p>(Optimal therapy for vomiting and diarrhea should be based on institutional guidelines with consideration of the prohibited medications listed in these protocol guidelines).</p>                                    |
| Hepatobiliary                              | <p>≥Grade 2 total bilirubin &gt;7 consecutive days</p> <p>≥Grade 3 total bilirubin</p> <p>≥Grade 2 ALT with a ≥grade 2 bilirubin elevation of any duration in the absence of liver metastases</p> <p>≥Grade 3 ALT for &gt;4 consecutive days</p> <p>Grade 4 ALT or AST</p> <p>Grade 4 serum alkaline phosphatase &gt;7 consecutive days</p>                    |
| Renal                                      | ≥Grade 3 serum creatinine                                                                                                                                                                                                                                                                                                                                      |
| Stomatitis                                 | <p>≥Grade 3—everolimus is associated with stomatitis. Per the Afinitor<sup>®</sup> package insert, topical treatments are recommended, but alcohol-, hydrogen peroxide-, iodine-, or thyme-containing mouthwashes should be avoided as they may exacerbate the condition. Antifungal agents should not be used unless fungal infection has been diagnosed.</p> |
| Pneumonitis                                | <p>Noninfectious pneumonitis—everolimus is associated with pneumonitis. The use of corticosteroids is suggested for grade 1–2 pneumonitis, recommended for grade 3 pneumonitis, and grade 4 pneumonitis should result in the cessation of everolimus.</p>                                                                                                      |
| Nonhematological nonhepatic adverse events | ≥Grade 3 except for the following exceptions:                                                                                                                                                                                                                                                                                                                  |
| Exceptions to DLT criteria                 | <p>Grade 3 alopecia</p> <p>&lt;5 days of grade 3 fatigue</p> <p>Grade 3 fever or infection without neutropenia &lt;5 days duration</p> <p>Grade 3 laboratory abnormalities that are responsive to oral supplementation or deemed by the investigator to be clinically insignificant</p>                                                                        |

ALT, alanine aminotransferase; AST, aspartate aminotransferase; CTCAE, Common Terminology Criteria for Adverse Events; DLT, dose-limiting toxicity; ECG QT, (electrocardiogram) QT interval.

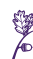

Supplement: Supp_Table1.pdf [file Supp_Table1.pdf]
